# Supplementary material
Source: publisher figshare collection journal article supplement (https://plos.figshare.com/articles/dataset/_/1451173)
Supplement: Supplementary file [file 1]

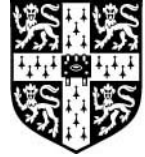

Study no.

## BRACHYCEPHALIC STUDY QUESTIONNAIRE

**Date:** \_\_\_\_\_

**Owner name:** \_\_\_\_\_

**Email address:** \_\_\_\_\_

**Contact number:** \_\_\_\_\_

**Address (optional):** \_\_\_\_\_

**Dog name:** \_\_\_\_\_

**Breed:** ☐ Pug ☐ French bulldog ☐ English bulldog ☐ Others \_\_\_\_\_

**Kennel club registration number (if applicable):** \_\_\_\_\_

**Chip number (if applicable):** \_\_\_\_\_

**Age:** \_\_\_\_\_ year(s) and \_\_\_\_\_ month(s)

**Gender:** ☐ Male ☐ Female

**Neuter:** ☐ Intact ☐ Neutered

**Coat colour(s):** \_\_\_\_\_

**Body weight:** \_\_\_\_\_ Kg

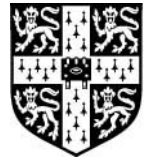

**Q1. How much exercise does your dog get on average in a day or a week?**

\_\_\_\_\_ minute(s)/walk, and \_\_\_\_\_ walks/day or \_\_\_\_\_ walks/week

**Q2. Does your dog breathe loudly while awake at rest?**

☐ Never ☐ Rarely (<once a week) ☐ Frequently (>once a week) ☐ Always

**Q2.1. Have you noticed any high pitch noise rather than snorting?**

☐ Never ☐ Yes ☐ Not sure

**Q3. Does your dog breathe loudly while sleeping?**

☐ Never ☐ Rarely (<once a week) ☐ Frequently (>once a week) ☐ Always

**Q4. Does your dog breathe loudly during physical exercise?**

☐ Never ☐ Rarely (<once a week) ☐ Frequently (>once a week) ☐ Always

**Q4.1. Have you noticed any high pitch noise rather than snorting?**

☐ Never ☐ Yes ☐ Not sure

**Q4.2. Have you noticed inspiratory effort during exercise?**

☐ Never ☐ Yes ☐ Not sure

**Q5. Has your dog ever had difficulty breathing during exercise or when excited in WINTER?**

☐ Never ☐ Rarely (<once a week) ☐ Frequently (>once a week) ☐ Always

Details: \_\_\_\_\_

**Q5.1. How much time does your dog need to recover after physical stress?**

☐ up to 5 mins ☐ up to 10 mins ☐ up to 15 mins ☐ up to 20 mins

**Q6. Has your dog ever had difficulty breathing during exercise or when excited in SUMMER?**

☐ Never ☐ Rarely (<once a week) ☐ Frequently (>once a week) ☐ Always

Details: \_\_\_\_\_

**Q6.1. How much time does your dog need to recover after physical stress?**

☐ up to 5 mins ☐ up to 10 mins ☐ up to 15 mins ☐ up to 20 mins



**Q7. Has your dog ever collapsed because of dyspnoea?**

☐ Never ☐ Yes

**Q7.1. If yes, how many times have you noted this episode?**

☐ once ☐ twice ☐ more than three times

**Q8. Has your dog ever been cyanotic (i.e. blue-purple tongue)?**

☐ Never ☐ Rarely (<once a week) ☐ Frequently (>once a week) ☐ Always

**Q9. Has your dog ever had reverse sneezing?**

☐ Never ☐ Rarely (<once a week) ☐ Frequently (>once a week) ☐ Always  
☐ Not sure

**Q10. Does your dog have one of the following problems with eating?**

**Q10.1. Regurgitation/vomiting:**

☐ Never ☐ Rarely (<once a week) ☐ Frequently (>once a week) ☐ Always

**Q10.2. Choking on food:**

☐ Never ☐ Rarely (<once a week) ☐ Frequently (>once a week) ☐ Always

**Q10.3. Out of breath during eating:**

☐ Never ☐ Rarely (<once a week) ☐ Frequently (>once a week) ☐ Always

**Q11. Does your dog have one of the following problems with sleeping?**

**Q11.1. Wake up a few times during sleep/being almost unable to sleep:**

☐ Never ☐ Rarely (<once a week) ☐ Frequently (>once a week) ☐ Always  
☐ Not sure

**Q11.2. Only able to sleep with the chin in an elevated position:**

☐ Never ☐ Rarely (<once a week) ☐ Frequently (>once a week) ☐ Always  
☐ Not sure

**Q11.3 Attempting to sleep in a sitting position:**

☐ Never ☐ Rarely (<once a week) ☐ Frequently (>once a week) ☐ Always  
☐ Not sure



**Q12. Does your dog have any health problem(s) other than respiration?**

☐ No ☐ Yes

If yes, details:

---

---

Is your dog on any medication?

---

**Q13. Has your dog undergone any surgical procedure(s)?**

☐ No ☐ Yes; surgical procedures: \_\_\_\_\_

If yes, when did he/she undergo the surgery?

\_\_\_\_\_ year(s) and \_\_\_\_\_ month(s) old

The outcome of the surgery:

☐ Very satisfied ☐ Satisfied ☐ Neutral ☐ Dissatisfied ☐ Very dissatisfied

Details:

---

---



**Please provide any additional comments regarding your dog or this clinical survey**

Would you like to receive updates on our study? ☐ No ☐ Yes

**Thank you very much for your help!**  
**We greatly appreciate your time and cooperation in filling out this questionnaire.**

**Nai-Chieh Liu** *DVM MPhil*  
Clinical PhD candidate  
Email address: ncl25@cam.ac.uk

**Jane Ladlow** *MA VetMB CertVR CertSAS DipECVS MRCVS*  
European Specialist in Small Animal Surgery  
Email address: jfl1001@cam.ac.uk

**David Sargan** *MA PhD*  
Geneticist  
Email address: drs20@cam.ac.uk
